# Supplementary material
Source: PubMed Central journal article supplement (PMC3458373)
Supplement: 1213903109_pnas.201213903SI.pdf [file 1213903109_pnas.201213903SI.pdf]

# Supporting Information

Kim et al. 10.1073/pnas.1213903109

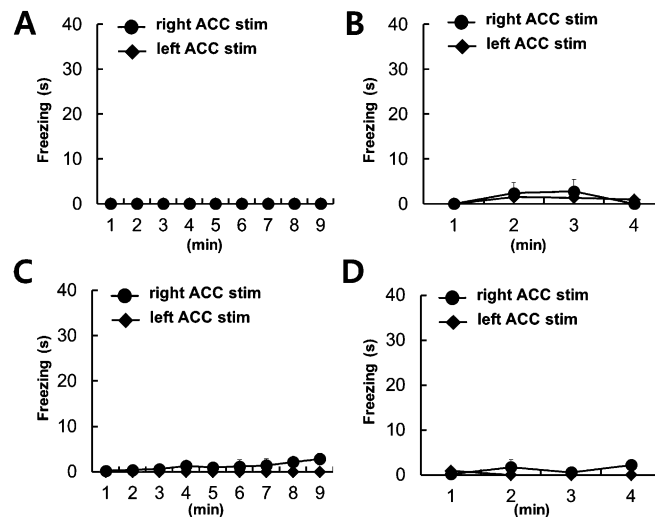

**Fig. S1.** Anterior cingulate cortex (ACC) stimulation alone does not evoke freezing behavior. (A and B) Electrical stimulation in left ( $n = 7$ ) or right ( $n = 5$ ) ACC evoked no freezing behavior in mice without the presence of demonstrator mice during observational fear conditioning ( $F_{1,10} = 0$ ,  $P = 1$ ; A) and on the next day during the 24-h contextual memory test ( $F_{1,10} = 0.108$ ,  $P = 0.749$ ; B). (C and D) Electrical stimulation in left ( $n = 4$ ) or right ( $n = 4$ ) ACC evoked no freezing behavior in mice when the demonstrator mice received no foot shocks during the conditioning phase ( $F_{1,6} = 2.603$ ,  $P = 0.158$ ; C) and 24-h later during the memory recall test ( $F_{1,6} = 1.152$ ,  $P = 0.324$ ; D). Error bars represent SEM.



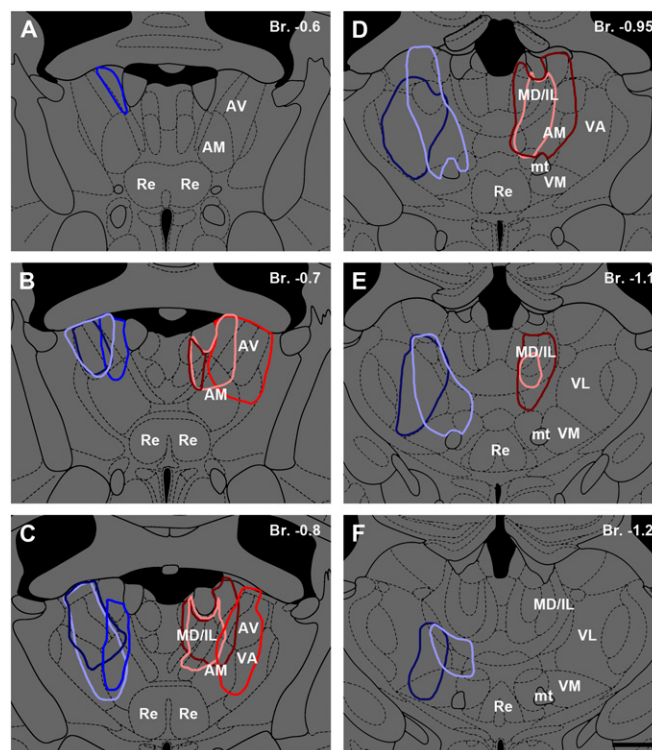

**Fig. S3.** Total extent of three left (blue) and three right (red) thalamic lesions presented in Fig. 3. (A and B) Neurochemical lesions affected the anterior quarter of the thalamus. The maximal (anteroposterior  $\times$  mediolateral  $\times$  dorsoventral) extent of a lesion was 500  $\mu\text{m}$   $\times$  500  $\mu\text{m}$   $\times$  1,000  $\mu\text{m}$ . The lesions involved the anteroventral (AV), AM, and MD/IL thalamic nuclei in all cases. All of these lesions were unilateral. Lesions spreading to the contralateral side were discarded from the analysis. mt, mammillothalamic tract; VA, ventral anterior thalamic nucleus. Other abbreviations as in Fig. S2. (Scale bars, 500  $\mu\text{m}$ .)

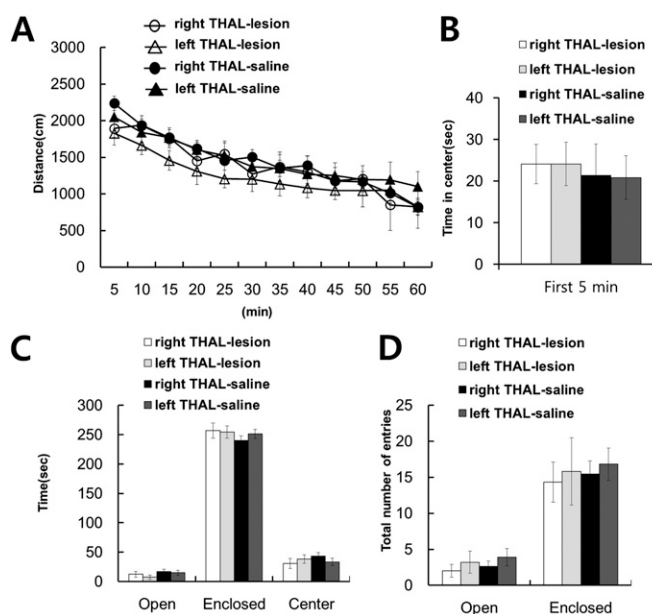

**Fig. S4.** Thalamic (THAL)-lesioned mice showed similar levels of anxiety and locomotor activity as in control mice. (A and B) Thalamic lesion and saline-injected mice showed similar locomotor activity (right thalamic ibotenic acid injection vs. right thalamic saline injection,  $F_{1,15} = 0.3$ ,  $P = 0.592$ ; left thalamic ibotenic acid injection vs. left thalamic saline injection,  $F_{1,14} = 1.931$ ,  $P = 0.186$ ) (A) and spent similar time in the center (right thalamic ibotenic acid injection vs. right thalamic saline injection,  $P = 0.574$ ; left thalamic ibotenic acid injection vs. left thalamic saline injection,  $P = 0.851$ ) during the open-field test (B). (C and D) Total time spent in each arm and center (C) as well as the total number of entries into each arm (D) were similar in the thalamic-lesioned and saline-injected mice in the elevated plus maze. Error bars represent SEM.
